# Supplementary material
Source: publisher figshare collection journal article supplement (https://karger.figshare.com/articles/dataset/_/5129284)
Supplement: Supplementary file 1 [file 1]

**Supplemental Table 1.** Differences in Quality of Life and Body Image evaluated by QLQ-C30, QLQ-BR23 and BIS across treatment groups

| Questionnaires                                | BCS group<br>(n = 72) | M group<br>(n = 44) | R group<br>(n = 41) |          |
|-----------------------------------------------|-----------------------|---------------------|---------------------|----------|
|                                               | Mean (SD)             | Mean (SD)           | Mean (SD)           | P-value* |
| <b>EORTC QLQ-C30</b>                          |                       |                     |                     |          |
| Global Health Status/QoL-GQL                  | 67.6 (21.1)           | 60.0 (25.3)         | 69.6 (19.1)         | 0.094    |
| <b>Functioning<sup>a</sup></b>                |                       |                     |                     |          |
| Physical functioning                          | 81.0 (17.5)           | 74.6 (22.4)         | 84.2 (14.5)         | 0.049    |
| Role functioning                              | 85.3 (20.1)           | 73.6 (26.4)         | 82.3 (24.7)         | 0.033    |
| Emotional functioning                         | 71.8 (21.0)           | 66.8 (23.9)         | 72.3 (20.9)         | 0.409    |
| Cognitive functioning                         | 76.5 (21.7)           | 70.9 (25.8)         | 78.3 (21.5)         | 0.287    |
| Social functioning                            | 84.1 (19.6)           | 76.0 (26.6)         | 85.6 (19.2)         | 0.063    |
| <b>Symptom<sup>b</sup></b>                    |                       |                     |                     |          |
| Fatigue                                       | 27.5 (20.1)           | 33.5 (21.4)         | 26.5 (18.4)         | 0.203    |
| Nausea and vomiting                           | 5.4 (10.2)            | 8.5 (19.4)          | 6.7 (10.9)          | 0.479    |
| Pain                                          | 26.3 (22.9)           | 28.8 (24.8)         | 20.4 (21.8)         | 0.233    |
| Dyspnoea                                      | 16.5 (22.8)           | 24.7 (26.7)         | 11.2 (18.9)         | 0.026    |
| Insomnia                                      | 28.4 (27.9)           | 39.1 (34.6)         | 25.8 (31.9)         | 0.100    |
| Appetite loss                                 | 4.5 (15.0)            | 13.5 (26.1)         | 7.2 (18.9)          | 0.062    |
| Constipation                                  | 16.5 (22.8)           | 15.0 (26.2)         | 18.5 (29.6)         | 0.820    |
| Diarrhoea                                     | 5.0 (14.2)            | 5.2 (17.4)          | 8.8 (19.5)          | 0.471    |
| Financial difficulties                        | 22.9 (30.7)           | 28.5 (33.2)         | 16.9 (26.8)         | 0.217    |
| <b>EORTC QLQ-BR23 Functioning<sup>a</sup></b> |                       |                     |                     |          |
| Body image                                    | 80.6 (22.8)           | 67.6 (28.7)         | 68.0 (29.0)         | 0.012    |
| Sexual functioning                            | 19.0 (19.7)           | 20.6 (23.4)         | 26.8 (24.8)         | 0.188    |
| Sexual enjoyment                              | 18.3 (25.3)           | 24.0 (31.5)         | 29.8 (29.4)         | 0.114    |
| Future perspective                            | 51.8 (29.4)           | 48.7 (38.2)         | 52.4 (27.8)         | 0.841    |
| <b>Symptom<sup>b</sup></b>                    |                       |                     |                     |          |
| Systemic therapy side effects                 | 23.1 (15.2)           | 25.6 (19.7)         | 20.7 (16.2)         | 0.404    |
| Upset by hair loss                            | 7.3 (18.6)            | 16.5 (30.8)         | 12.9 (29.6)         | 0.155    |
| Breast symptoms                               | 17.5 (14.2)           | 13.8 (16.0)         | 12.3 (14.8)         | 0.164    |
| Arm symptoms                                  | 22.6 (20.9)           | 25.5 (23.7)         | 23.0 (21.8)         | 0.771    |
| Body Image Scale-BIS                          | 4.25 (4.88)           | 8.86 (7.49)         | 7.88 (7.99)         | 0.001    |

<sup>a</sup> In GQL scale and functioning domain, higher score = better QoL.

<sup>b</sup> In Symptom domain, higher score = high level of symptomatology.

BIS has range 0 to 30, higher score indicating worse body image,

\*ANOVA, analysis of variance – F-test,

SD, Standard Deviation. See text for other abbreviations.
